## Pharmacokinetics of Morphine:

### Concentrations in the Serum and Brain of the Dog during Hyperventilation

K. Nishitateno, M.D.,\* S. H. Ngai, M.D.,† A. D. Finck, M.D.,‡ B. A. Berkowitz, Ph.D.§

The disposition of morphine in the serum and in the cerebral cortex during normocarbica and hypocarbica was studied in dogs. Normocarbica was maintained by controlled ventilation with air ( $pH_a$ , 7.40;  $Pa_{CO_2}$ , 40 torr) and by controlled hyperventilation with a gas mixture of  $CO_2$ , 3 per cent,  $O_2$ , 21 per cent, balance  $N_2$  ( $pH_a$ , 7.40;  $Pa_{CO_2}$ , 38 torr). Hypocarbica was induced by hyperventilation with air ( $pH_a$ , 7.57,  $Pa_{CO_2}$ , 20 torr). After achievement of a steady acid-base status, morphine sulfate, 2 mg/kg, was injected intravenously. Thereafter, serial samples of serum and cerebral cortex were taken at intervals for four hours and analyzed for morphine concentrations using radioimmunoassay. In dogs with hypocarbica, serum morphine concentrations 15-240 min following intravenous injections were higher; the serum half-life during the elimination phase remained unchanged, 62-65 min. The apparent volume of distribution,  $V_d$ , and plasma clearance,  $Cl_p$ , of morphine were less during hypocarbica. Morphine concentrations in the cerebral cortex were significantly increased at 15-240 min during hypocarbica. Estimated half-lives of morphine in the cerebral cortex were 5.5 hours during normocarbica, and 8.2 hours during hypocarbica. Maintenance of normocarbica during hyperventilation minimized these changes. These results suggest that during hypocarbica the higher serum morphine concentrations, higher drug distribution coefficient in lipid phase and increased ratio of free base: acid salt of morphine facilitated the penetrance of morphine into the brain, in spite of decreased cerebral blood flow. Once in the brain, a greater portion of morphine was probably present in the protonated form in a relatively acidic milieu and thus less able to pass through lipid barriers back to the circulation. (Key words: Acid-base equilibrium; alkalosis, respiratory. Analgesics, narcotic: morphine. Carbon dioxide: hypocarbica. Pharmacokinetics: narcotics, morphine. Ventilation: hyperventilation.)

THE  $pK_a$  VALUES, partition coefficients, and drug distribution coefficients (apparent partition coefficients, octanol/water) of various narcotics and narcotic antagonists have been reported to be markedly dependent on  $pH$  and temperature.<sup>1,2</sup>

Ainslie *et al.* have reported that both hypocarbica

and hypercarbica changed the concentration and half-life of fentanyl in canine brain.<sup>3</sup> We recently reported that respiratory acidosis increased morphine concentrations and prolonged its half-life in the cerebral cortex.<sup>3</sup> In this paper, we report our studies of the effects of hyperventilation in the presence or absence of hypocarbica on the concentration-time course of morphine in the serum and in the cerebral cortex in dogs.

#### Materials and Methods

Mongrel dogs of either sex weighing 9-19 kg were anesthetized with pentobarbital sodium, 30 mg/kg, injected intravenously, and prepared for serial sampling of the blood and the cerebral cortex as described by Finck *et al.*<sup>3</sup> One group of dogs ( $n = 7$ ) was maintained at normocarbica by ventilation with room air. The minute volume was approximately 200 ml/kg ( $V_T$ , 10 ml/kg;  $f$ , 20). Mean  $pH_a$  was  $7.40 \pm 0.01$  (SEM),  $Pa_{CO_2}$ ,  $40 \pm 1$  torr, and  $Pa_{O_2}$ ,  $87 \pm 2$  torr. In the second group of dogs ( $n = 5$ ), the minute volume was doubled, but normocarbica was maintained by using a gas mixture containing  $CO_2$ , 3 per cent,  $O_2$ , 21 per cent, balance  $N_2$ . Mean  $pH_a$  in this group was  $7.40 \pm 0.01$ ,  $Pa_{CO_2}$ ,  $38 \pm 1$  torr, and  $Pa_{O_2}$ ,  $109 \pm 3$  torr. In the third group of dogs ( $n = 8$ ), the lungs were hyperventilated with room air with the same minute volume as that of the second group, to give a mean  $pH_a$  of  $7.57 \pm 0.01$ ,  $Pa_{CO_2}$ ,  $20 \pm 1$  torr, and  $Pa_{O_2}$ ,  $105 \pm 1$  torr.

After 30 min or more of steady acid-base status, morphine sulfate, 2 mg/kg, was injected intravenously over 30 sec. Arterial blood samples were taken 2, 5, 10, 15, 30, 60, 120, 180, 240 min, and cerebral cortex samples 5, 15, 30, 60, 120, 180, 240 min, after the injection. Blood was allowed to clot, and the serum separated by centrifugation and frozen until analyzed. Serial biopsy samples of the cerebral cortex were frozen.

Morphine concentrations in the serum and in the cortical tissue were determined in duplicate by radioimmunoassay using rabbit antiserum as described by Spector<sup>4</sup> and by Berkowitz *et al.*<sup>5</sup> For the batch of antiserum used for the present study, a 1:1,500 dilution was appropriate.

\* Assistant Resident, presently Assistant Professor of Anesthesia, The University of Tokyo, Japan.

† Professor of Anesthesiology and Pharmacology, Columbia University.

‡ Assistant Professor of Anesthesiology, Columbia University.

§ Associate Member, Roche Institute of Molecular Biology.

Received from the Departments of Anesthesiology and Pharmacology, College of Physicians and Surgeons, Columbia University, New York, New York 10032, and the Department of Physiological Chemistry, Roche Institute of Molecular Biology, Nutley, New Jersey 07110. Accepted for publication September 18, 1978. Supported in part by NIGMS, Grant 5P50-GM-09069.

Address reprint requests to Dr. Ngai: Department of Anesthesiology, Presbyterian Hospital, 622 West 168th Street, New York, New York 10032.

<sup>3</sup> Ainslie SG, Eisele JH, Corkill G, et al: Fentanyl- $CO_2$  interaction in canine brain and blood (abstr). American Society of Anesthesiologists, Annual Meeting, 1977, pp 15-16.

Serum morphine concentration profile of individual dogs was fitted by a two-compartment open model using log-linear regression analysis.<sup>6</sup> Serum morphine pharmacokinetic parameters were calculated directly from the coefficients and exponents of the biexponential equation derived from the individual fitting.<sup>7,8</sup> The brain half-life during 30–240 min was calculated individually from the coefficient of the log-linear regression line.

Comparisons between groups were made by applying Student *t* tests for unpaired data of serum and brain concentrations, serum morphine pharmacokinetic parameters, and brain morphine half-life.

### Results

Mean serum morphine concentrations at 15 through 240 min during hypocarbia were significantly higher than those during normocarbia (table 1). Increased pulmonary ventilation, when normocarbia was maintained, did not change serum morphine concentrations significantly. The serum half-lives of morphine during distribution and elimination phases,

TABLE 1. Morphine Concentrations in the Serum Following Intravenous Injection of Morphine Sulfate, 2 mg/kg, under Three Experimental Conditions

| Time (Min) | Morphine (μg/ml)    |                                           |                    |
|------------|---------------------|-------------------------------------------|--------------------|
|            | Normocarbia (n = 7) | Hyperventilation with Normocarbia (n = 5) | Hypocarbia (n = 8) |
| 2          | 1.42 ± 0.15         | 1.68 ± 0.12                               | 1.60 ± 0.15        |
| 5          | 0.76 ± 0.05         | 0.95 ± 0.06                               | 0.96 ± 0.07        |
| 10         | 0.50 ± 0.03         | 0.59 ± 0.03                               | 0.64 ± 0.06        |
| 15         | 0.37 ± 0.02         | 0.43 ± 0.02                               | 0.48 ± 0.04*       |
| 30         | 0.24 ± 0.02         | 0.25 ± 0.01                               | 0.32 ± 0.02*†      |
| 60         | 0.140 ± 0.008       | 0.167 ± 0.011                             | 0.197 ± 0.013*     |
| 120        | 0.067 ± 0.004       | 0.070 ± 0.011                             | 0.090 ± 0.004*†    |
| 180        | 0.033 ± 0.002       | 0.044 ± 0.005                             | 0.054 ± 0.004*     |
| 240        | 0.022 ± 0.001       | 0.028 ± 0.004                             | 0.033 ± 0.003*     |

Values are means ± SEM; numbers of dogs in parentheses.

\*† *P* < 0.05 compared with values during normocarbia and during hyperventilation with normocarbia, respectively.

TABLE 2. Pharmacokinetic Values of Morphine in the Serum

|                                    | Normocarbia (n = 7) | Hyperventilation with Normocarbia (n = 5) | Hypocarbia (n = 8) |
|------------------------------------|---------------------|-------------------------------------------|--------------------|
| <i>T</i> <sub>1/2α</sub> (min)     | 4.5 ± 0.3           | 4.4 ± 0.2                                 | 4.5 ± 0.3          |
| <i>T</i> <sub>1/2β</sub> (min)     | 62 ± 2              | 65 ± 4                                    | 65 ± 2             |
| <i>V</i> <sub>1</sub> (l/kg)       | 1.01 ± 0.11         | 0.72 ± 0.02                               | 0.83 ± 0.09        |
| <i>V</i> <sub>d</sub> (l/kg)       | 4.08 ± 0.25         | 3.60 ± 0.08                               | 3.23 ± 0.18*       |
| <i>Cl</i> <sub>p</sub> (ml/kg/min) | 48.7 ± 3.6          | 38.7 ± 2.3                                | 34.2 ± 1.6*        |

Values are means ± SEM; numbers of dogs in parentheses.

\* *P* < 0.05 compared with normocarbia.

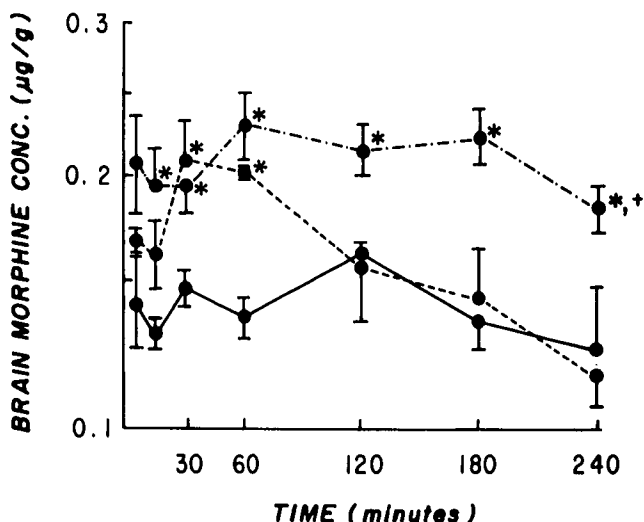

FIG. 1. Brain decrement curves in the dog after morphine sulfate, 2 mg/kg, iv. Solid line (●—●), normocarbia; broken line (---●), hyperventilation with normocarbia; semi-broken line (—·—●), hypocarbia. Vertical bars are SE. Number of dogs in each group as in table 1.

*T*<sub>1/2α</sub> and *T*<sub>1/2β</sub>, respectively, were similar in all groups. *T*<sub>1/2α</sub> values were 4.5 min and *T*<sub>1/2β</sub> values varied between 62 and 65 min. The initial volume of distribution, *V*<sub>1</sub>, was not altered to a significant extent by hyperventilation. However, the apparent volume of distribution, *V*<sub>d</sub>, calculated by the area method, as well as plasma clearance, *Cl*<sub>p</sub>, of morphine were significantly decreased by hypocarbia (table 2). *V*<sub>d</sub> and *Cl*<sub>p</sub> in dogs with normocarbic hyperventilation had intermediate values.

The mean morphine concentrations in the cerebral cortex at 15 through 240 min in hypocarbic dogs and at 30 and 60 min in hyperventilated dogs with normocarbia were significantly higher than those of the air-ventilated normocarbic group (fig. 1). In three normocarbic dogs, the morphine concentrations in the cerebral cortex did not decline. In the rest of this group, the mean estimated brain half-life of morphine was 5.5 ± 1.1 hours. In hyperventilated dogs, the mean estimated brain half-lives of morphine were 8.2 ± 0.8 with hypocarbia and 5.1 ± 0.5 hours with normocarbia. The difference between the latter two groups was significant.

### Discussion

The kinetics of morphine in the serum following intravenous injection into dogs are best fit by a two-compartment open model (fig. 2). The serum morphine elimination half-life is in close agreement to that we previously reported,<sup>3</sup> and averages about an hour. In addition, the absolute values at 2, 5, 10, and

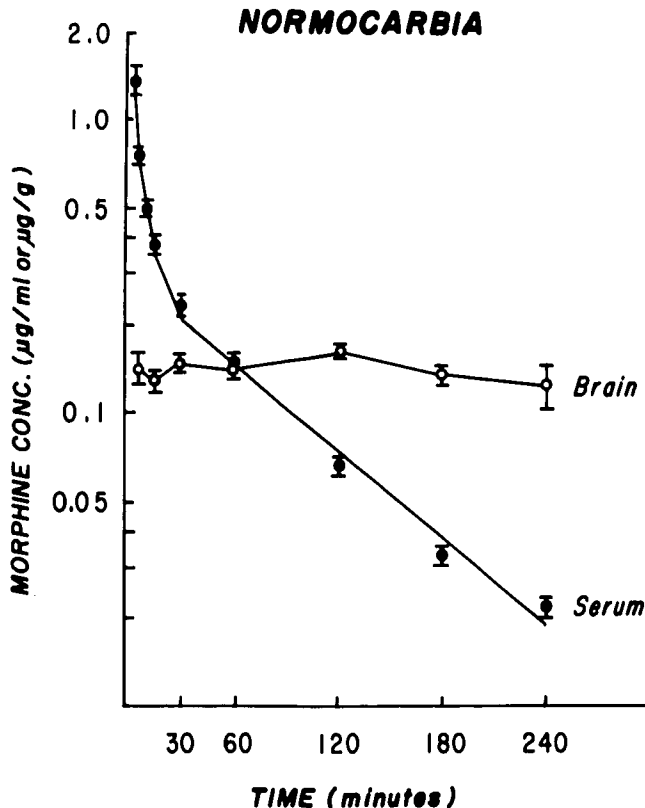

FIG. 2. Serum and brain decrement curves in normocarbic dogs, showing relationship of brain morphine concentrations to those in serum. Note intersections of serum and brain morphine decrement curves at approximately one hour. Vertical bars are SE,  $n = 7$ .

15 min for the serum and all concentrations in the cerebral cortex are also similar. We did find one difference in the serum concentrations of morphine in normal dogs between our present and previous study. In this study the morphine concentrations in the sera of normocarbic dogs at one, two and four hours were 0.14, 0.07, and 0.02  $\mu\text{g/ml}$ , respectively. Using similar methods, we previously found morphine values of 0.24, 0.15, and 0.04  $\mu\text{g/ml}$  for the same time intervals.<sup>3</sup>

These differences can best be explained on the basis of different specificities of antisera used.<sup>5,9</sup> In our previous study,<sup>3</sup> the batch of antiserum recognized morphine glucuronide with one-eighth the sensitivity compared with unmetabolized morphine. Morphine glucuronide is the major metabolite of morphine in the dog.<sup>10</sup> The antiserum used in the present study was more specific, in that it recognized the conjugated morphine at one-fortieth the sensitivity compared with unmetabolized morphine. This greater specificity would result in lower serum values of morphine at later time intervals compared with our earlier study. At the initial time intervals (2–15 min) and for

morphine concentrations in the cerebral cortex, there would be no difference between these studies, as little morphine glucuronide is expected to be present. The lower serum concentrations of morphine reported here could also explain the larger apparent volume of distribution ( $V_d$ ), 4.08 l/kg, compared with 2.72 l/kg reported previously.<sup>3</sup>

Intravenously injected drug is initially distributed to and diluted by the central blood volume of the body to establish a certain initial concentration, which then is further decreased by distribution of the drug to the tissues and by elimination. When normovolemia can be assumed, the factors that may decrease cardiac output during mechanical hyperventilation are decreased  $\text{PaCO}_2$ , increased  $\text{pH}$  of the blood, and exaggerated fluctuations in airway pressure, *i.e.*, increased mean intrathoracic pressure.<sup>11</sup> Among these,  $\text{PaCO}_2$  level is known to play a major role in changing cardiac output.<sup>12,13</sup> In the present study, higher serum concentrations, apparently smaller  $V_i$ , and lower  $\text{Cl}_b$  of morphine during hypocarbia may implicate a decreased cardiac output.

The higher  $\text{pH}$  during alkalosis would result in an increased ratio of free base to acid salt of morphine as predicted by the Henderson-Hasselbalch equation. For the protonated nitrogen of morphine, the postulated  $\text{pK}_a$  is 7.93.<sup>1</sup> The solution of the equation gives (free base)/(acid salt) ratios of 1/3.4 and 1/2.3 at the observed  $\text{pH}$  values of 7.40 and 7.57, respectively. On the other hand, it has been reported that the increase in  $\text{pH}$  is accompanied by a consistent increase in morphine binding to human albumin *in vitro*.<sup>14</sup> An increase of 0.2  $\text{pH}$  unit increases binding from 36 to 39 per cent. If this were the case in the dog, the effect would be a minor decrease in the amount of unbound morphine. Therefore, during hypocarbia presumably more morphine in the serum is available for distribution into the tissue.

Moreover, the drug distribution coefficients (apparent partition coefficients, octanol/water),  $P_{**}$  for a number of narcotics and narcotic antagonists are sensitive to  $\text{pH}$ .<sup>1</sup> For morphine sulfate, in particular, at a  $\text{pH}$  of 7.40,  $P$  equals 1.42 at 37 C, whereas at a  $\text{pH}$  of 7.57,  $P$  is increased to 1.88 (interpolated). This factor would be expected to facilitate the passage of morphine into the brain and other tissues, and to increase  $V_d$ . Our finding was, however, a smaller  $V_d$  in the presence of hypocarbia. The reason for this discrepancy is not clear.

$$P_{**} = \frac{(\text{free base} + \text{acid salt})\text{lipid}}{(\text{free base} + \text{acid salt})\text{water}}$$

$$= \frac{(\text{free base})\text{lipid}}{(\text{free base} + \text{acid salt})\text{water}} \quad (\text{from Kaufman } et al.^1).$$

The observed decrease in  $P_{aCO_2}$  from 40 to 20 torr would be expected to decrease cerebral blood flow approximately to half in hypocarbic dogs.<sup>15,16</sup> The effect of decreased cerebral blood flow would be a diminution of morphine distribution into and egress from the brain. However, our findings suggest that during the distribution phase this effect is probably overcome by increased availability and lipid solubility of morphine in hypocarbic dogs.

Once in the brain, a greater portion of morphine may exist in the protonated form, the acid salt, in relatively acidic milieu. MacMillan and Siesjö<sup>17</sup> estimated the intracellular  $pH$  values in the rat brain to be 7.04, 7.10, 7.09, and 7.02 for  $P_{aCO_2}$  values of 38, 26, 15, and 9 torr, respectively, assuming 15 per cent of the cerebral cortex to be extracellular space. Extrapolated to the dog, a lesser portion, approximately 11–13 per cent, of morphine in the cerebral cortex would be available for crossing the lipid barriers back into the circulation. This factor may account for the longer estimated half-life of morphine in the brain than in the serum.

In this study we did not examine the analgesic effect of morphine administered acutely. A reasonable correlation has been reported to exist between the concentrations of morphine in the brain and analgesic activity in mice and rats.<sup>18,19</sup> Our findings of increased brain morphine concentrations following hyperventilation of dogs could be an explanation of the clinical impression that during anesthesia in man, hyperventilation appears to decrease the requirement for narcotics.

The authors thank Mrs. Erlinda Samaniego for her expert technical assistance.

## References

1. Kaufman JJ, Semo NM, Koski WS: Microelectrometric titration measurement of the  $pK_a$ 's and partition and drug distribution coefficients of narcotics and narcotic antagonists and their  $pH$  and temperature dependence. *J Med Chem* 18:647–655, 1975
2. Benson DW, Kaufman JJ, Koski WS: Theoretic significance of  $pH$  dependence of narcotics and narcotic antagonists in clinical anesthesia. *Anesth Analg (Cleve)* 55:253–256, 1976
3. Finck AD, Berkowitz BA, Hempstead J, et al: Pharmacokinetics of morphine: Effects of hypercarbia on serum and brain morphine concentrations in the dog. *ANESTHESIOLOGY* 47:407–410, 1977
4. Spector S: Quantitative determination of morphine in serum by radioimmunoassay. *J Pharmacol Exp Ther* 178:253–258, 1971
5. Berkowitz BA, Cerreta KV, Spector S: The influence of physiologic and pharmacologic factors on the disposition of morphine as determined by radioimmunoassay. *J Pharmacol Exp Ther* 191:527–534, 1974
6. Niazi S: Application of a programmable calculator in data fitting according to one and two compartment open models in clinical pharmacokinetics. *Comp Prog Bio Med* 7:41–44, 1977
7. Greenblatt DJ, Koch-Weser J: Clinical pharmacokinetics (First of two parts). *N Engl J Med* 293:702–705, 1975
8. Wagner JG: Linear pharmacokinetic equations allowing direct calculation of many needed pharmacokinetic parameters from the coefficients and exponents of polyexponential equations which have been fitted to the data. *J Pharmacokin Biopharmaceut* 4:443–467, 1976
9. Catlin DH: Pharmacokinetics of morphine by radioimmunoassay: The influence of immunochemical factors. *J Pharmacol Exp Ther* 200:224–235, 1977
10. Mulé SJ, Woods LA: Distribution of N-C<sup>14</sup>-methyl labeled morphine. I. In central nervous system of nontolerant and tolerant dogs. *J Pharmacol Exp Ther* 136:232–241, 1962
11. Cournand A, Motley HL, Werko L, et al: Physiological studies of the effects of intermittent positive pressure breathing on cardiac output in man. *Am J Physiol* 152:162–174, 1948
12. Breivik H, Grenvik A, Millen E, et al: Normalizing low arterial  $CO_2$  tension during mechanical ventilation. *Chest* 63:525–531, 1973
13. Prys-Roberts C, Kelman GR, Greenbaum R, et al: Hemodynamics and alveolar–arterial  $P_{O_2}$  differences at varying  $P_{aCO_2}$  in anesthetized man. *J Appl Physiol* 25:80–87, 1968
14. Olsen GD: Morphine binding to human plasma proteins. *Clin Pharmacol Ther* 17:31–35, 1974
15. Harper AM, Glass NI: The effect of alterations in the arterial carbon dioxide tension on the blood flow through the cerebral cortex at normal and low arterial blood pressure. *J. Neurol Neurosurg Psychiatr* 28:449–452, 1965
16. Raichle ME, Posner JB, Plum F: Cerebral blood flow during and after hyperventilation. *Arch Neurol* 23:394–403, 1970
17. MacMillan V, Siesjö BK: The influence of hypocapnia upon intracellular  $pH$  and upon some carbohydrate substrates, amino acids and organic phosphates in the brain. *J Neurochem* 21:1283–1299, 1973
18. Patrick GA, Dewey WL, Spaulding TC, et al: Relationship of brain morphine levels to analgesic activity in acutely treated mice and rats and in pellet-implanted mice. *J Pharmacol Exp Ther* 193:876–883, 1975
19. Hips PP, Eveland MR, Meyer ER, et al: Mass fragmentation of morphine: Relationship between brain levels and analgesic activity. *J Pharmacol Exp Ther* 196:642–648, 1976
